# Supplementary material for: DDM1 and Lsh remodelers allow methylation of DNA wrapped in nucleosomes
Source: eLife journal article supplement (doi:10.7554/elife.30674), 2017-11-15
Supplement: supp [file elife-30674-supp-v1.zip]

|              |   |                                                               |
|--------------|---|---------------------------------------------------------------|
| Aureococcus  | 1 | MAAKKPASK-----KPAA-----                                       |
| Ostreococcus | 1 | MQVNALLKKAAPAPAKTAK-----APAKT-QIKK-----APAKKASPSL----         |
| Emiliana     | 1 | MAK--PAAK-----KPAA-----                                       |
| Micromonas   | 1 | MPPKM-----S                                                   |
| Arabidopsis  | 1 | MSEVEIENAAATIEGNTAADAPVTDAAVEKKPAAKGRKTKNVKEVKEKKTVAAPPKKRTVS |
| Mus          | 1 | MSETAPVAQAAS---TATE-----KPAAA-KKTK-----KPAKAAAPRK--KP         |
| Neurospora   | 1 | MPPKKTETKAADASAAAAP-----APAA-----APTSAPKTKSPS                 |

|              |    |                                                              |
|--------------|----|--------------------------------------------------------------|
| Aureococcus  | 14 | -----                                                        |
| Ostreococcus | 39 | -----PSL-----                                                |
| Emiliana     | 12 | -----                                                        |
| Micromonas   | 7  | AHPKYEDMVKAAILALKDKKGSVPATIAKYLAANFK---LPANFKKILSTQLKNLVKAG  |
| Arabidopsis  | 61 | SHPTYEEMIKDAIVTLKERTGSSQYAIQKFIEEKRK--E-LPPTFRKLLLLNLKRLVASG |
| Mus          | 38 | AGPSVSELIVQAVSSSKERSGVSLAALKKSLAAAGY--D-VEKNN-SRIKLGKSLVNKG  |
| Neurospora   | 36 | THASYLDMITDAIVALKDRAGSSRQALKKYVRANNTLGNVTDNMFDSLFNKALKNGVDKG |

|              |     |                                                              |
|--------------|-----|--------------------------------------------------------------|
| Aureococcus  | 14  | -----KKAAPKKKTV-----AK                                       |
| Ostreococcus | 42  | -----                                                        |
| Emiliana     | 12  | -----VK-KI-----AK                                            |
| Micromonas   | 63  | KLLKIKAS-----YKLGDAL-K-----                                  |
| Arabidopsis  | 118 | KLVKVKAS-----FKLPSAS-AKASSPKAAAEKSAPAKKKPATVAVTKAKRKVAAASKAK |
| Mus          | 94  | TLVQTKGTGAAGSFKLNKKAESKA-----IT-----TK                       |
| Neurospora   | 96  | VFEQPKGPS--GGTKLAKKV-AKP-----APKKAAPKKETK-----EK             |

|              |     |                                                               |
|--------------|-----|---------------------------------------------------------------|
| Aureococcus  | 26  | KPAAK-KAAPKP-----KAAPKPK-AAPK-----PKAAPKKKAAP                 |
| Ostreococcus | 42  | -----P-----NPFGGAPKASAKTVKKAAP                                |
| Emiliana     | 18  | KPAAK-KAAPKK-----PA-----AKKAAP                                |
| Micromonas   | 79  | -----KAPKKPKKKAAK                                             |
| Arabidopsis  | 172 | KTIADVVKPTAAAKKVTAKAKAKPVPRATAAATK-RKAVDAKPKAKARPAKAAKTAKVTSF |
| Mus          | 122 | VSVKA-KASGAACK-----P-----KKTAGAAAKKTVKTPKK--P                 |
| Neurospora   | 131 | KPAAA-KKEGAACK-----ETKEKK--APA-AKKA-AAPKKAAAPKKEVKEKKAAAP     |

|              |     |                                                             |
|--------------|-----|-------------------------------------------------------------|
| Aureococcus  | 59  | KKKAAPKPAAAKPAAKPAAKPAAAKPAAAKKAPAKKAKKAAP-----AKK          |
| Ostreococcus | 63  | A-----KKAVAK-KAPVKKAA--PVKKKAPVAKKAAKSPTAAKEALAKWYGAYLLK--- |
| Emiliana     | 37  | K-----K-----                                                |
| Micromonas   | 91  | K-----PKKKAA-KPKKKKAAKKPKKA-KKAAAKKAVKKPKK-----             |
| Arabidopsis  | 231 | A-----KKAVAA-----TKKVATVATKKKT-----PVKKVVVKPKT              |
| Mus          | 154 | K-----KPAVSK-K--TSKS--PKKPQVVKAQKVAKSPAKAKAVKPKASKAKVTKPKT  |
| Neurospora   | 178 | K-----KKAAAPAVADKETVLTKTSG-----RVAKSTAKPAA-----AKK          |

|              |     |                                                         |
|--------------|-----|---------------------------------------------------------|
| Aureococcus  | 107 | KTVA-KKPAAK-KSAKKKAAPKASKATGSRKSSRKSLLSNPVVAERGAAMKAAAN |
| Ostreococcus | 110 | -----AIG-----                                           |
| Emiliana     | 39  | -AAA-KKPAAK-KK-----                                     |
| Micromonas   | 126 | AKKATKKAVSK-KK-----                                     |
| Arabidopsis  | 261 | VKSPAKRASSRVKK-----                                     |
| Mus          | 202 | PAKP-KKAAPK-KK-----                                     |
| Neurospora   | 214 | AAAP-KKAAAS-KK-----AEKAEP-----AAEKA--                   |
