# Supplementary material for: DDM1 and Lsh remodelers allow methylation of DNA wrapped in nucleosomes
Source: eLife journal article supplement (doi:10.7554/elife.30674), 2017-11-15
Supplement: supp [file elife_poa_e30674_Transparent_Reporting_File.docx]

***eLife’s* transparent reporting form**

We encourage authors to provide detailed information *within their submission* to facilitate the interpretation and replication of experiments. Authors can upload supporting documentation to indicate the use of appropriate reporting guidelines for health-related research (see [EQUATOR Network](http://www.equator-network.org/%20)), life science research (see the [BioSharing Information Resource](https://biosharing.org/)), or the [ARRIVE guidelines](http://www.plosbiology.org/article/info:doi/10.1371/journal.pbio.1000412) for reporting work involving animal research. Where applicable, authors should refer to any relevant reporting standards documents in this form.

If you have any questions, please consult our Journal Policies and/or contact us: [editorial@elifesciences.org](mailto:editorial@elifesciences.org).

**Sample-size estimation**

- You should state whether an appropriate sample size was computed when the study was being designed
- You should state the statistical method of sample size computation and any required assumptions
- If no explicit power analysis was used, you should describe how you decided what sample (replicate) size (number) to use

Please outline where this information can be found within the submission (e.g., sections or figure legends), or explain why this information doesn’t apply to your submission:

Our data constitutes DNA methylation quantification and nucleosome positions across thousands to tens of thousands of genomic loci (depending on the particular analysis). Our claims regarding the relationship between DNA methylation and nucleosomes are supported by major phenotypic differences.

**Replicates**

- You should report how often each experiment was performed
- You should include a definition of biological versus technical replication
- The data obtained should be provided and sufficient information should be provided to indicate the number of independent biological and/or technical replicates
- If you encountered any outliers, you should describe how these were handled
- Criteria for exclusion/inclusion of data should be clearly stated
- High-throughput sequence data should be uploaded before submission, with a private link for reviewers provided (these are available from both GEO and ArrayExpress)

Please outline where this information can be found within the submission (e.g., sections or figure legends), or explain why this information doesn’t apply to your submission:

DNA methylation detection by bisulfite sequencing was performed on one biological sample of each genotype (one biological replicate), as is common for genome-wide DNA methylation analysis. MNase-sequencing experiments were carried out on 2 biological samples of each genotype (2 biological replicates), except for *h1ddm1*, for which we obtained 3 biological replicates. Our data analysis approach is thoroughly described in the methods section. Our RNA-seq experiments on WT were used to obtain relative expression levels for the purpose of separating genic nucleosomes into expression deciles. The RNA-seq data was obtained in 2 biological replicates, which were analyzed as explained in the methods section. All data are available in GEO with accession number GSE96994. Reviewers can anonymously access the data through the following link: <https://www.ncbi.nlm.nih.gov/geo/query/acc.cgi?token=ybcjymswvjyjrit&acc=GSE96994>

**Statistical reporting**

- Statistical analysis methods should be described and justified
- Raw data should be presented in figures whenever informative to do so (typically when N per group is less than 10)
- For each experiment, you should identify the statistical tests used, exact values of N, definitions of center, methods of multiple test correction, and dispersion and precision measures (e.g., mean, median, SD, SEM, confidence intervals; and, for the major substantive results, a measure of effect size (e.g., Pearson's r, Cohen's d)
- Report exact p-values wherever possible alongside the summary statistics and 95% confidence intervals. These should be reported for all key questions and not only when the p-value is less than 0.05.

Please outline where this information can be found within the submission (e.g., sections or figure legends), or explain why this information doesn’t apply to your submission:

We do not make claims regarding the statistical significance of our results. We make qualitative claims that are supported by major phenotypic differences between the genotypes we analyze.

(For large datasets, or papers with a very large number of statistical tests, you may upload a single table file with tests, Ns, etc., with reference to sections in the manuscript.)

**Group allocation**

- Indicate how samples were allocated into experimental groups (in the case of clinical studies, please specify allocation to treatment method); if randomization was used, please also state if restricted randomization was applied
- Indicate if masking was used during group allocation, data collection and/or data analysis

Please outline where this information can be found within the submission (e.g., sections or figure legends), or explain why this information doesn’t apply to your submission:

Arabidopsis data was grouped by genotype (WT, *h1, ddm1,* or *h1ddm1*). No attempt at randomization or masking was made in the analysis of this data.

**Additional data files (“source data”)**

- We encourage you to upload relevant additional data files, such as numerical data that are represented as a graph in a figure, or as a summary table
- Where provided, these should be in the most useful format, and they can be uploaded as “Source data” files linked to a main figure or table
- Include model definition files including the full list of parameters used
- Include code used for data analysis (e.g., R, MatLab)
- Avoid stating that data files are “available upon request”

Please indicate the figures or tables for which source data files have been provided:
