# Supplementary figures and images for: DDM1 and Lsh remodelers allow methylation of DNA wrapped in nucleosomes
Source: eLife journal article supplement (doi:10.7554/elife.30674), 2017-11-15

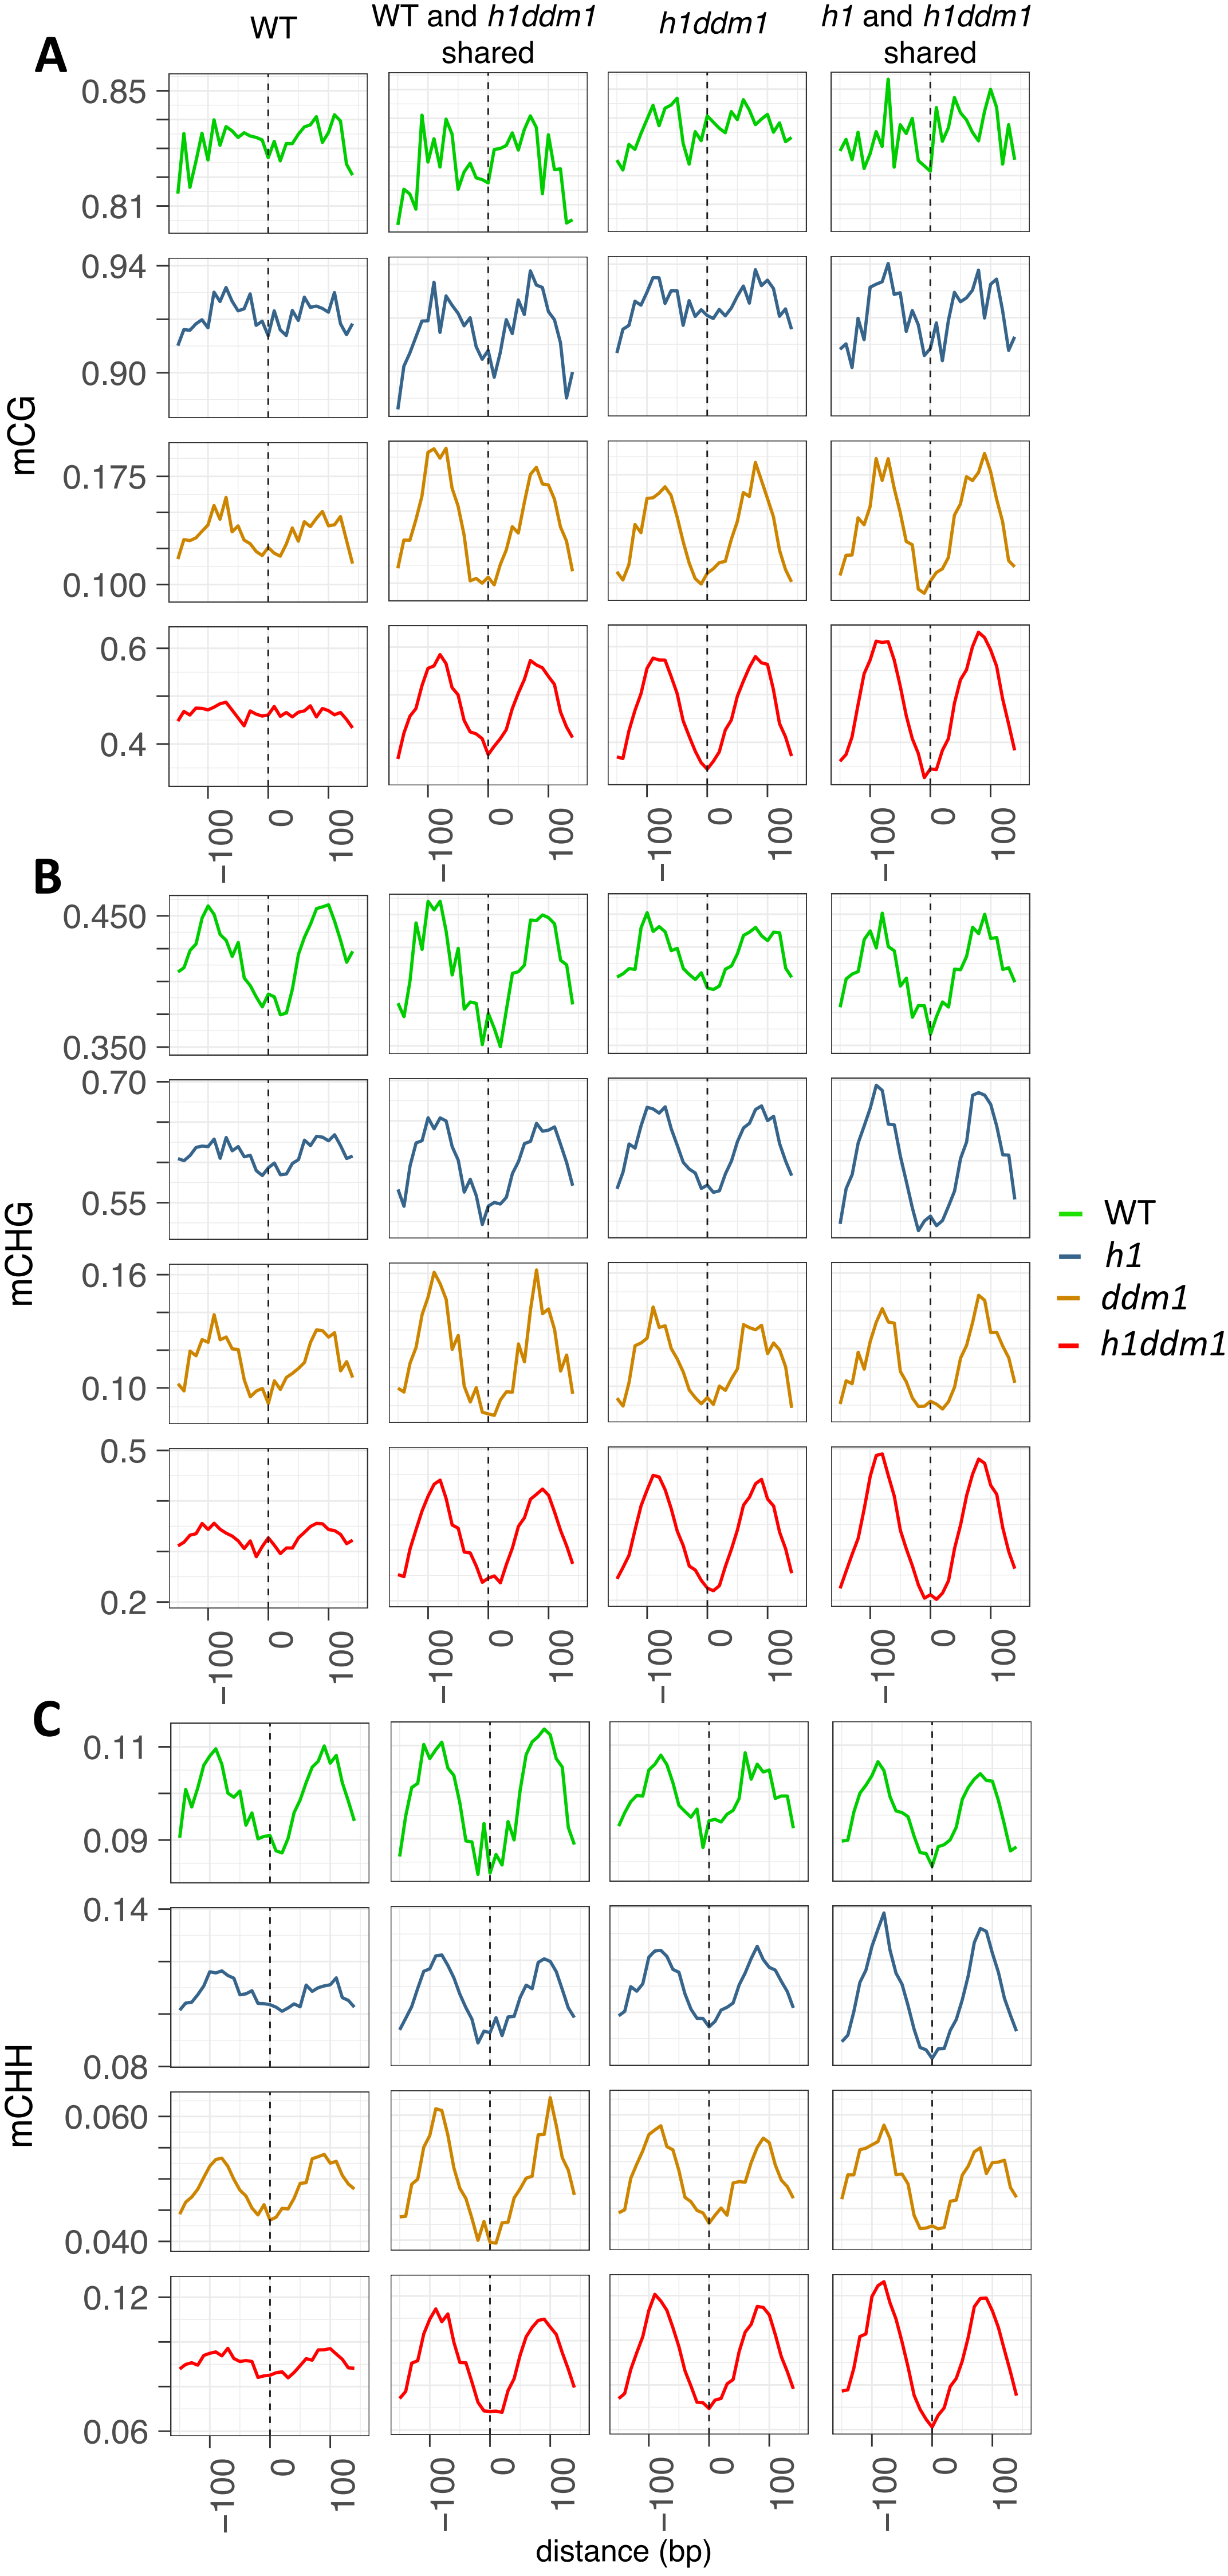

Supplement: supp [file elife-30674-supp-v1.zip]

— WT — *ddm1*  
— *h1* — *h1ddm1*

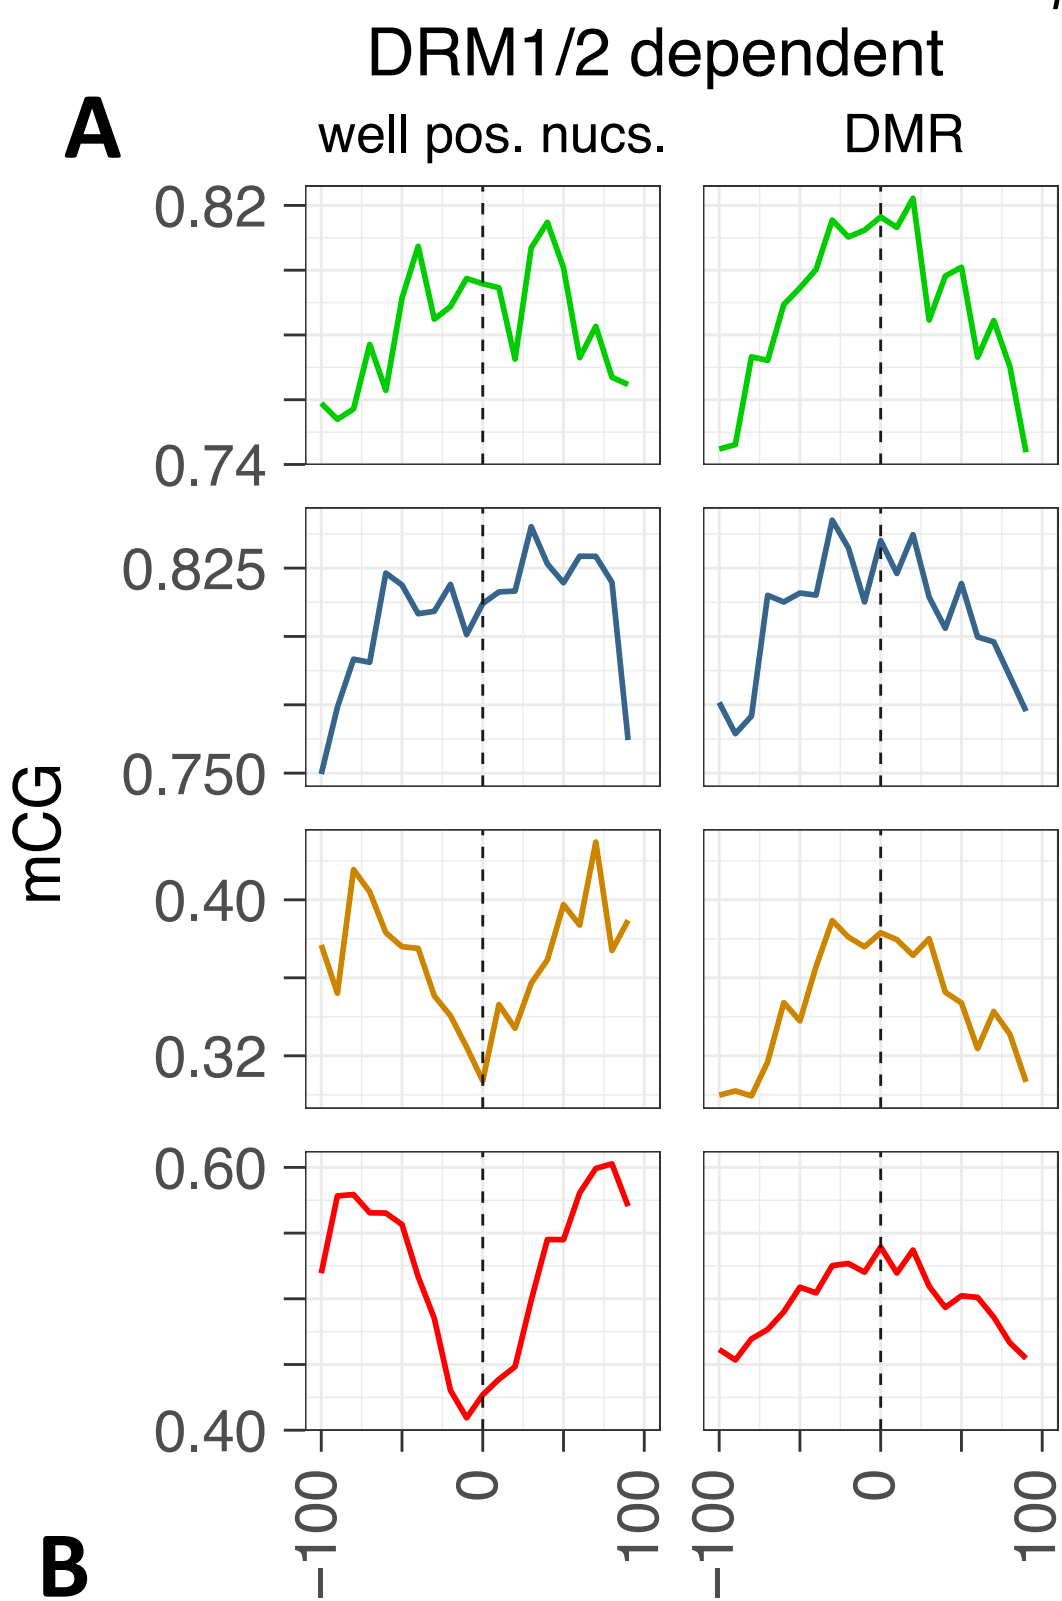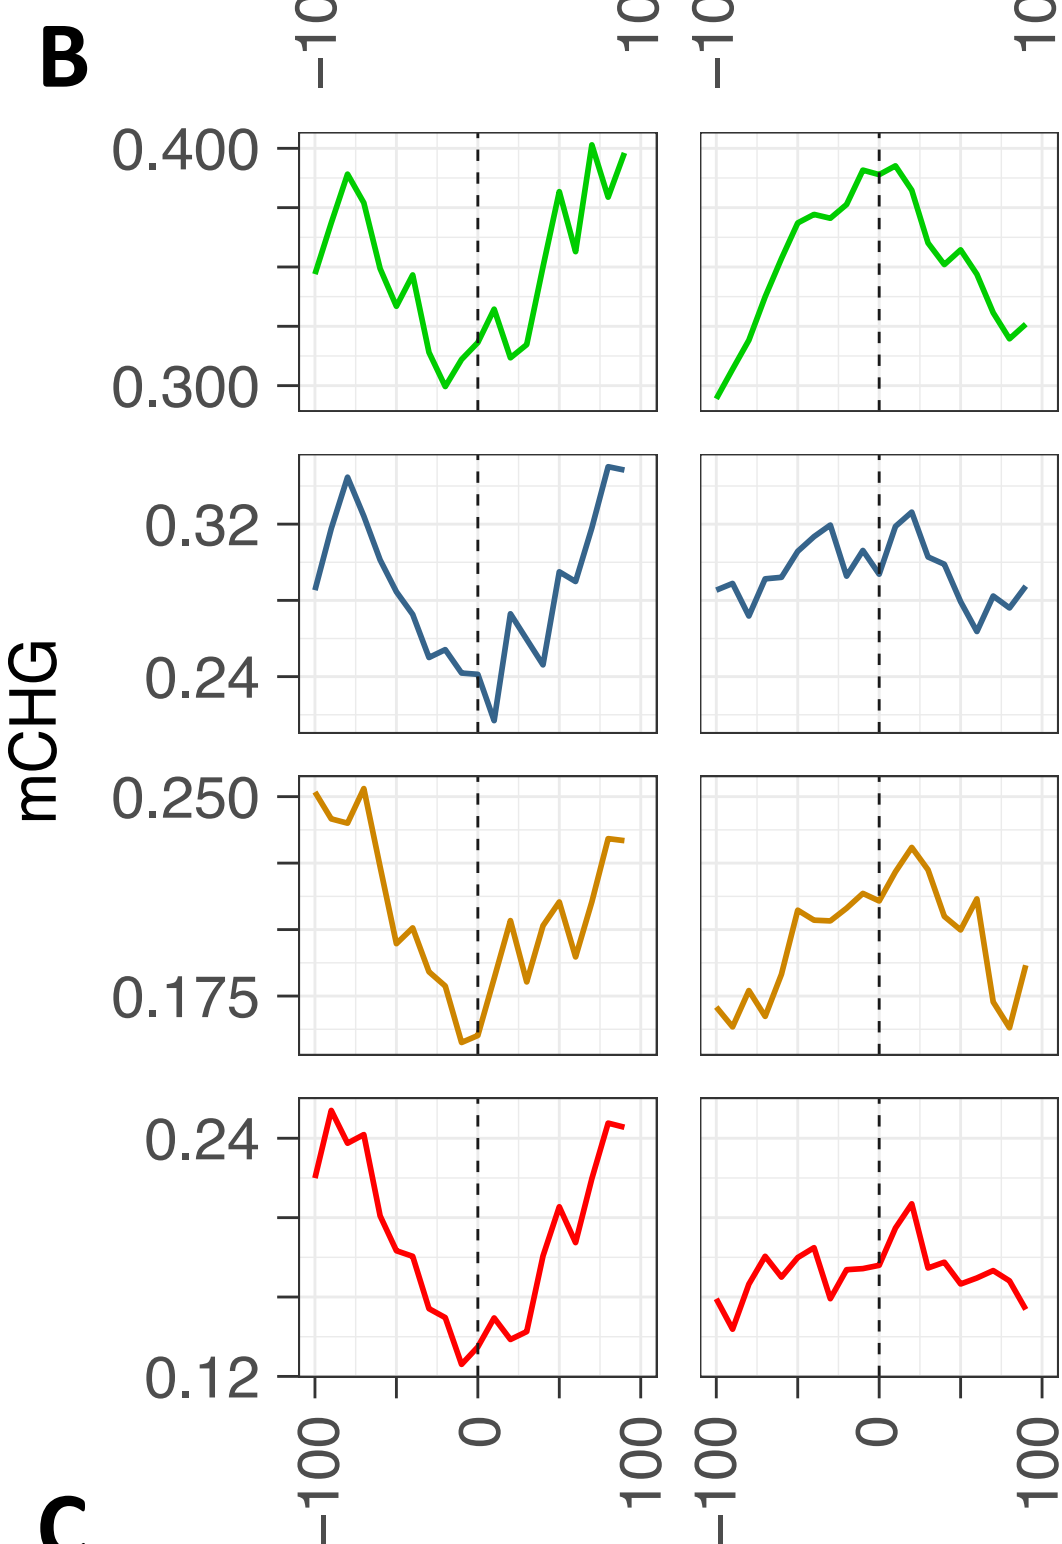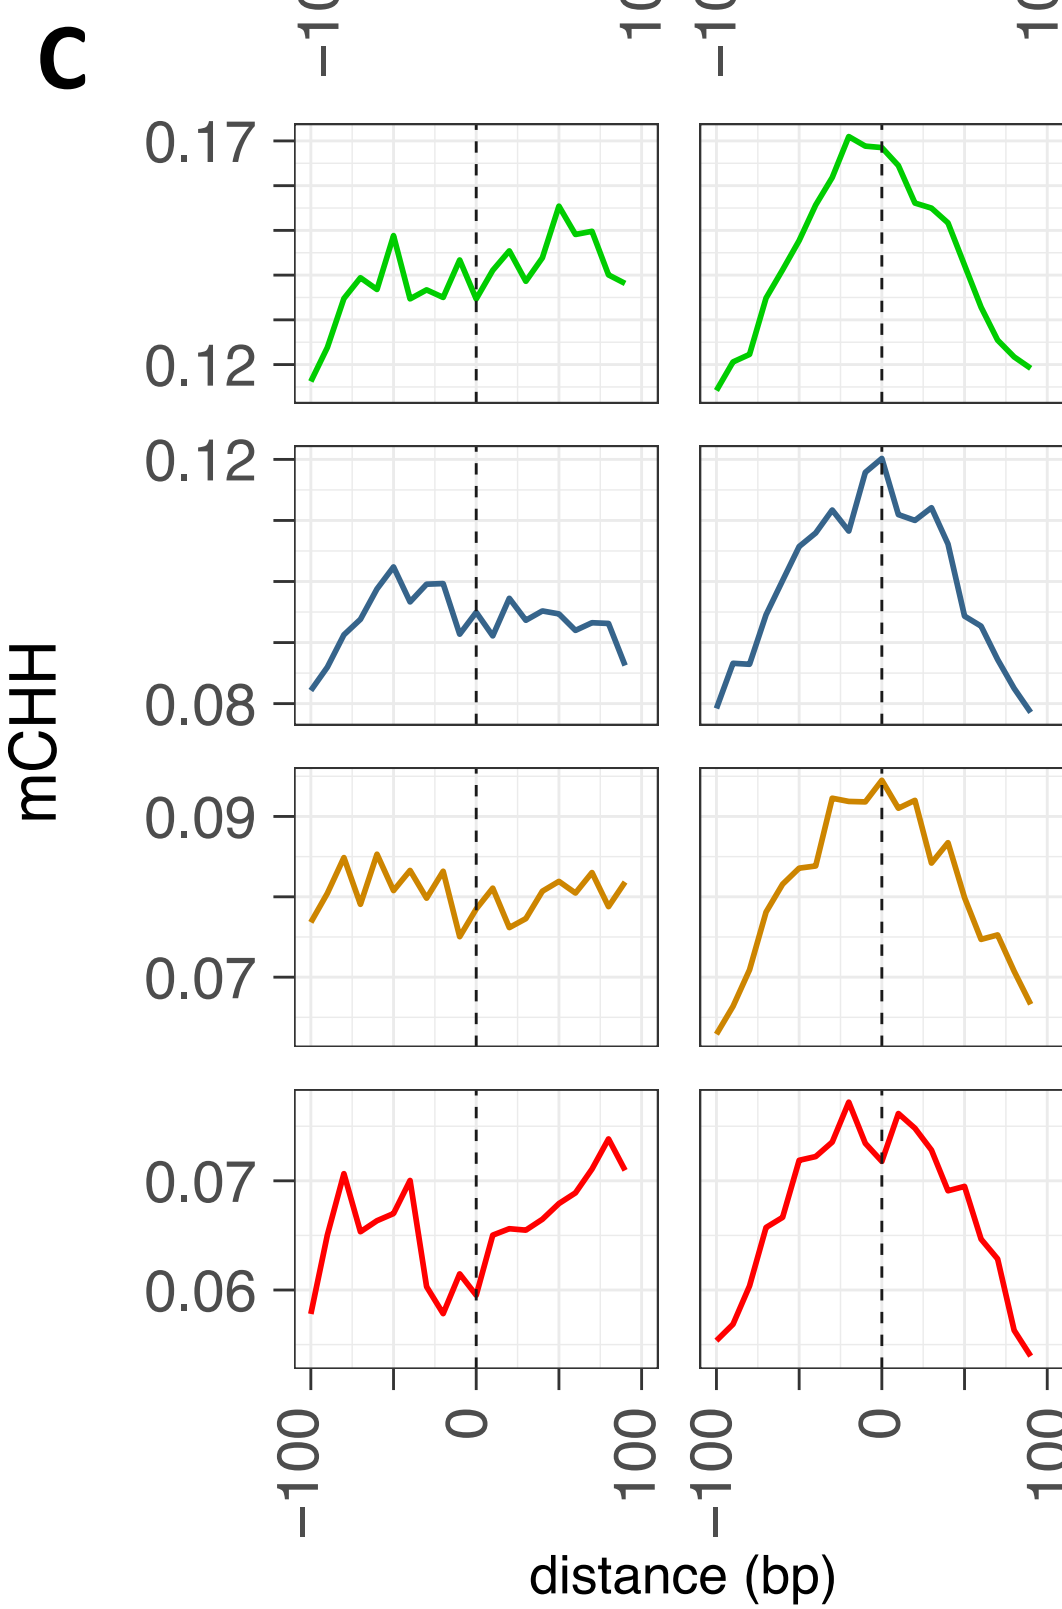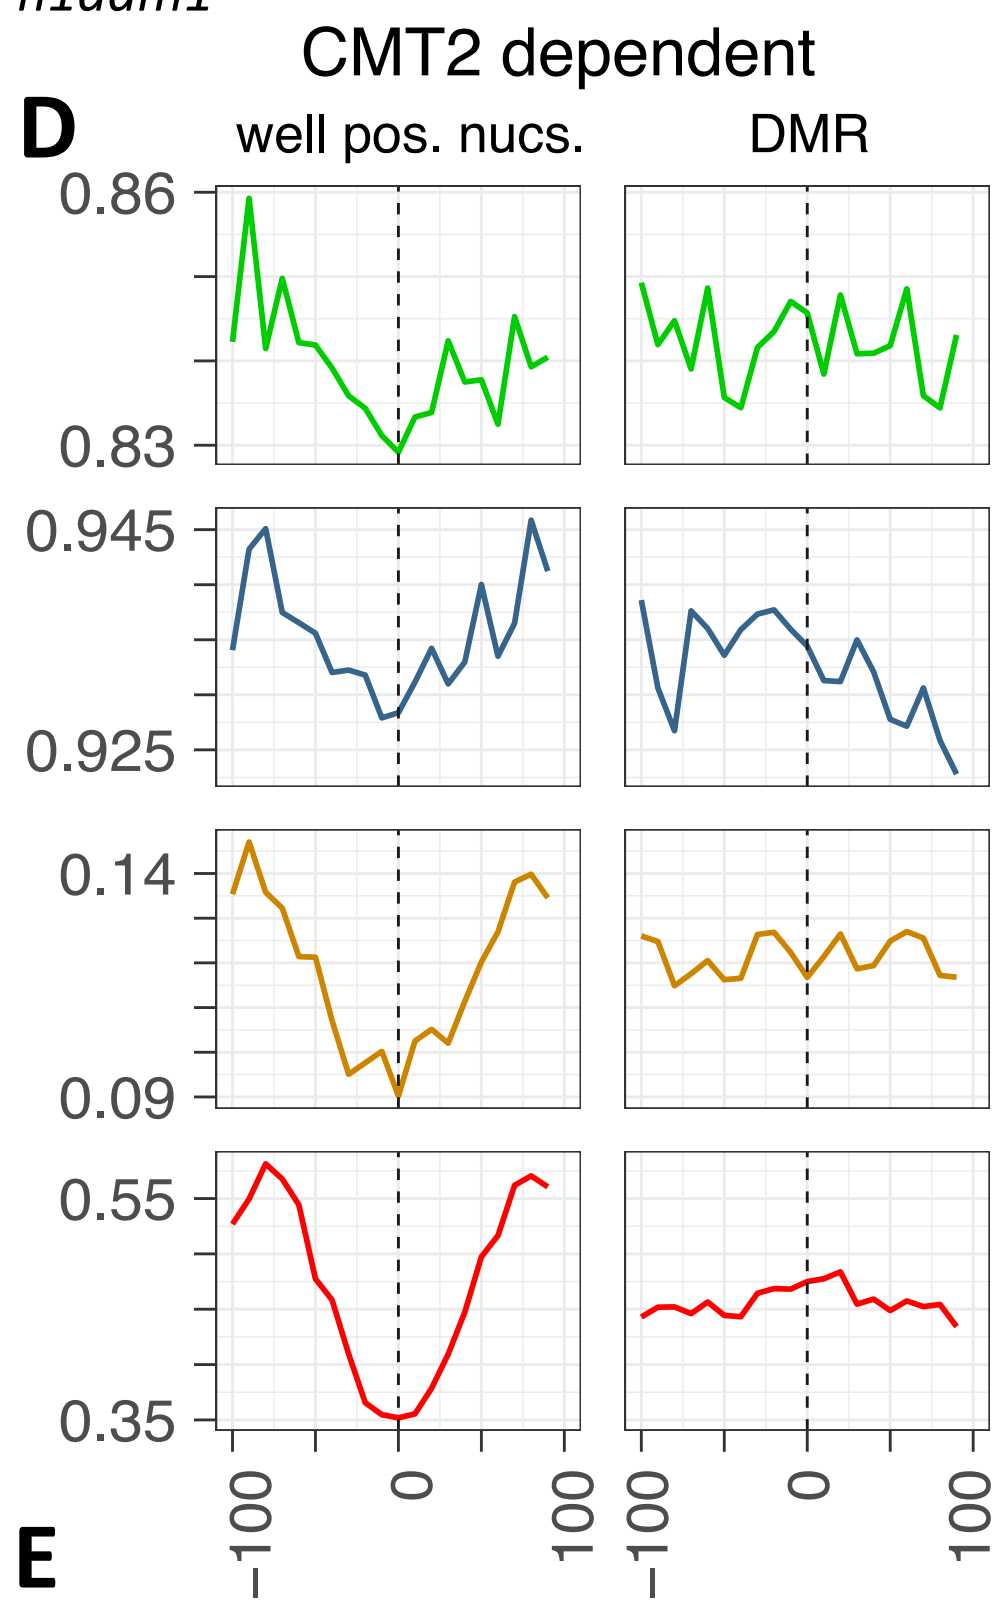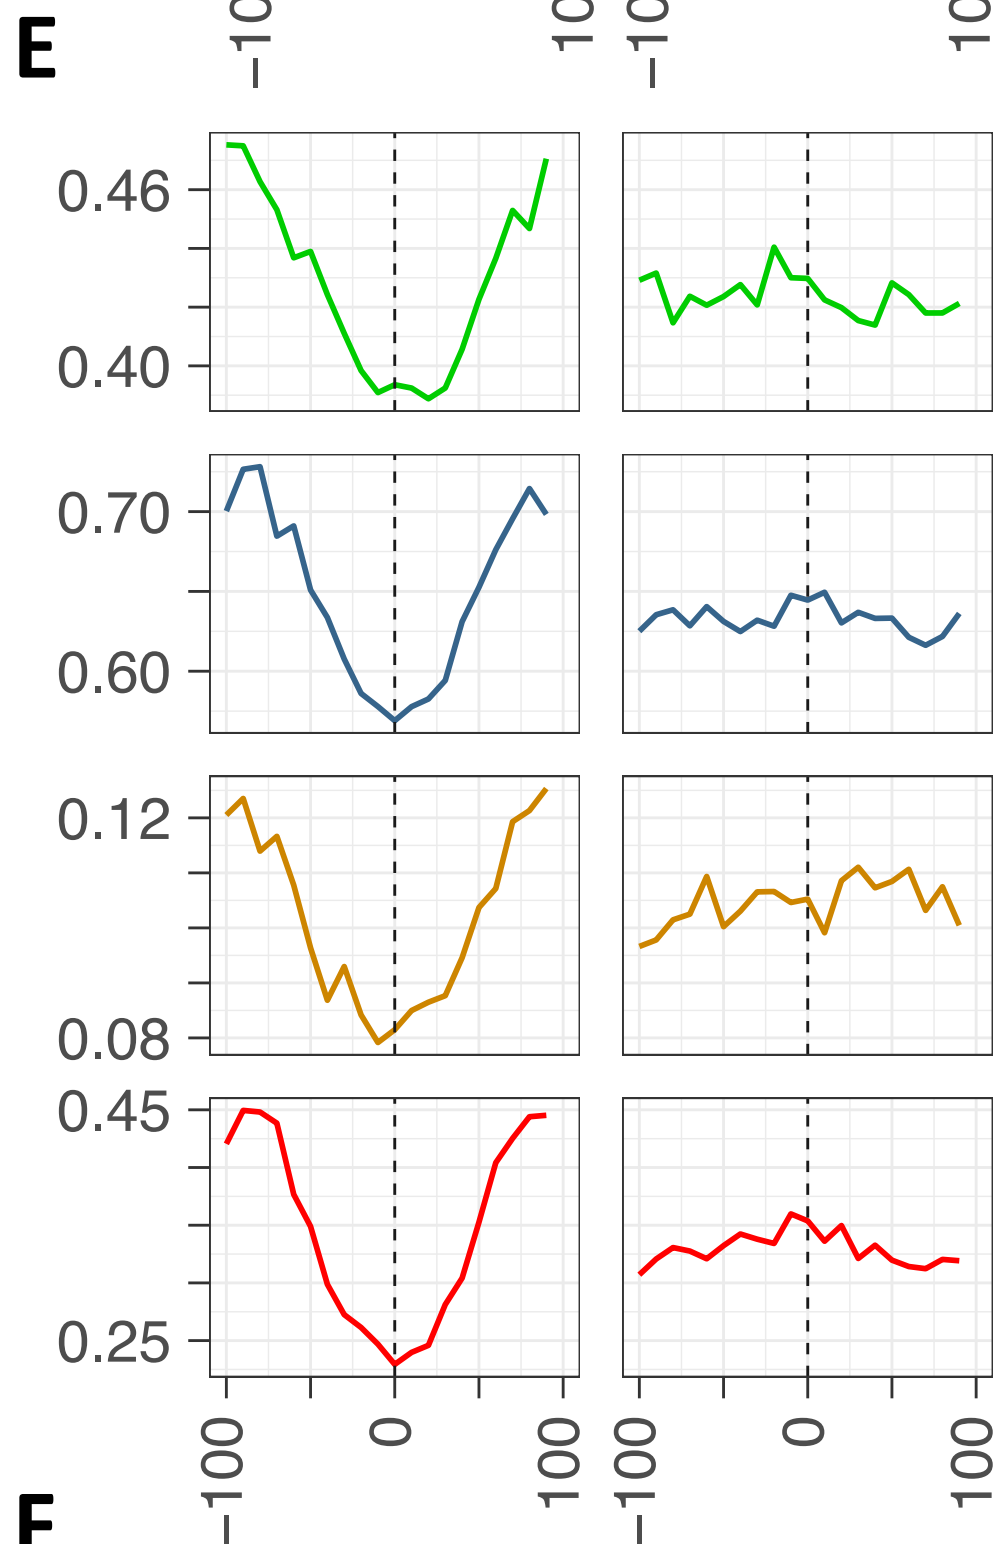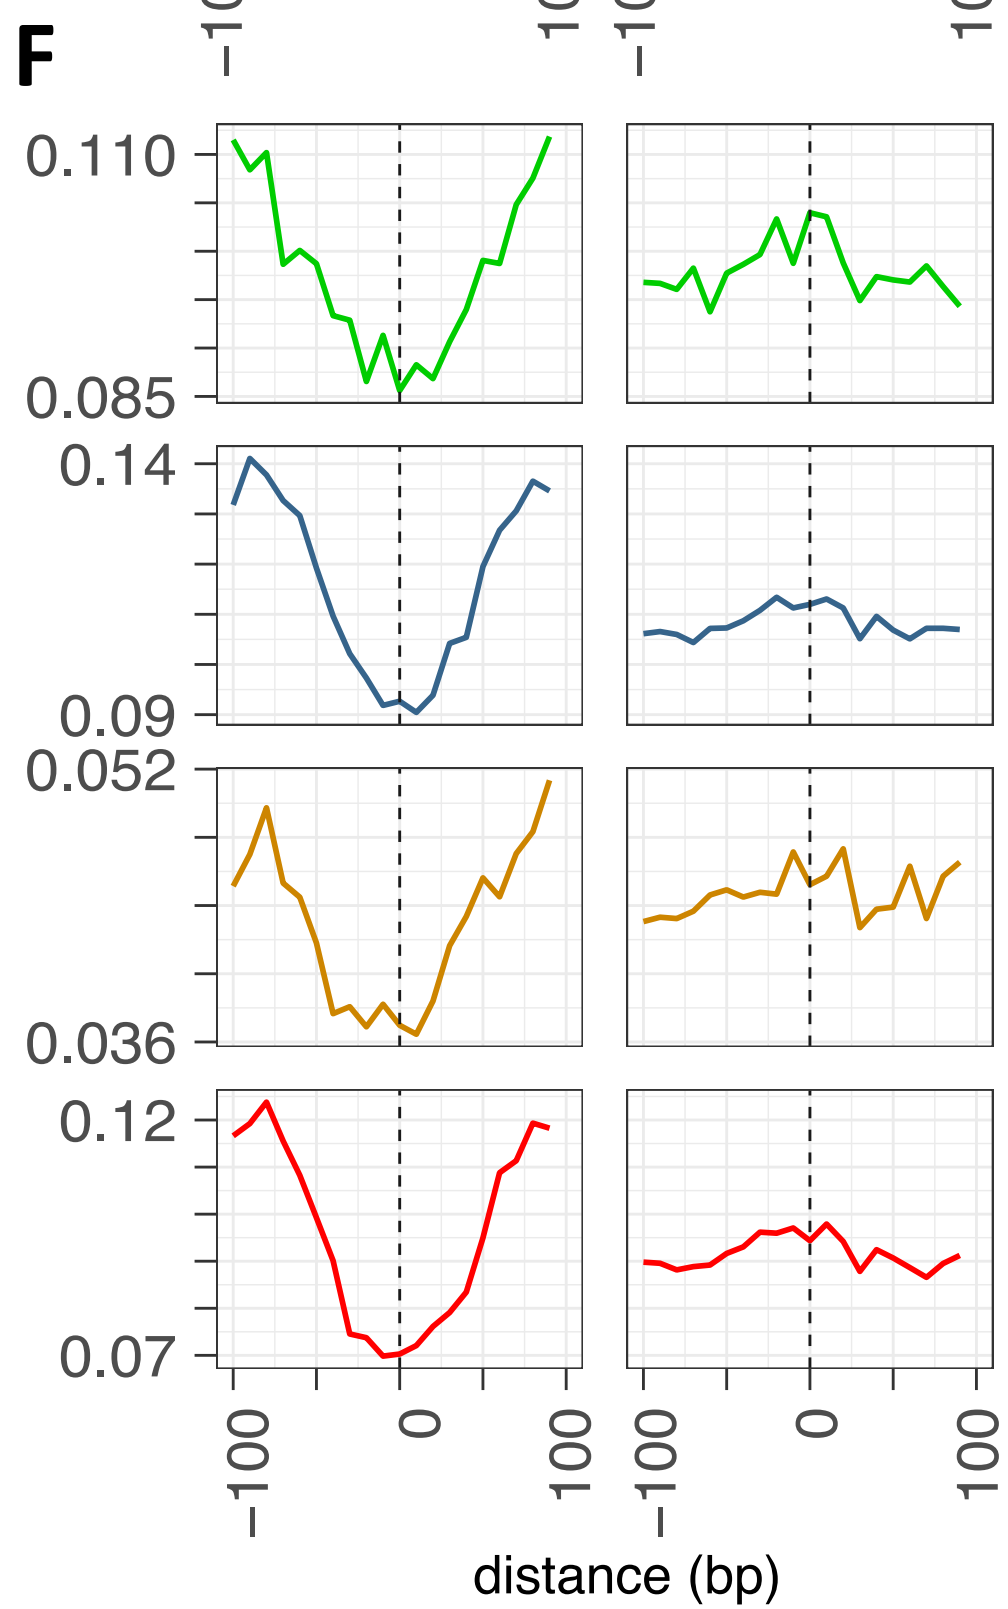

Supplement: supp [file elife-30674-supp-v1.zip]

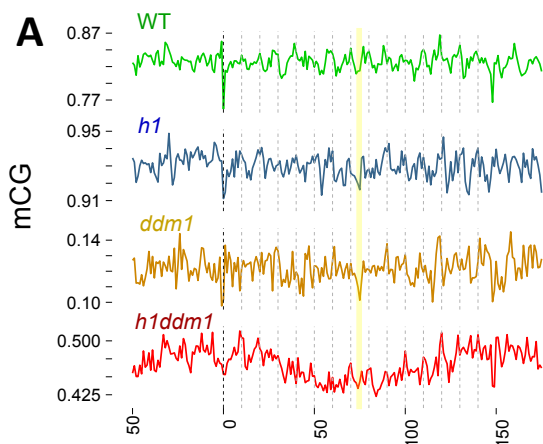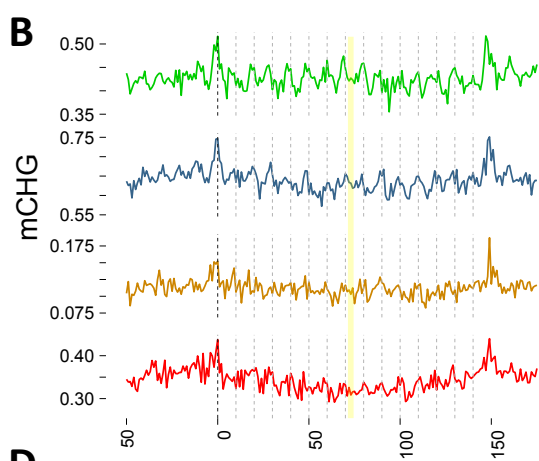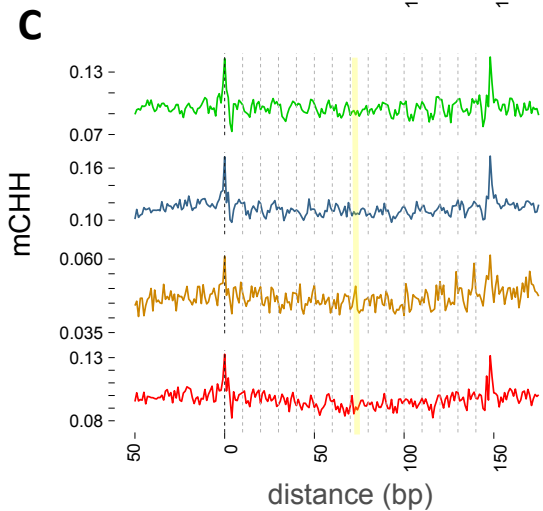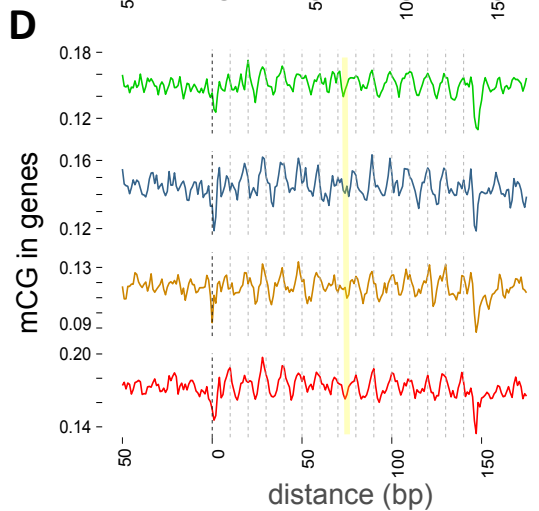

Supplement: supp [file elife-30674-supp-v1.zip]

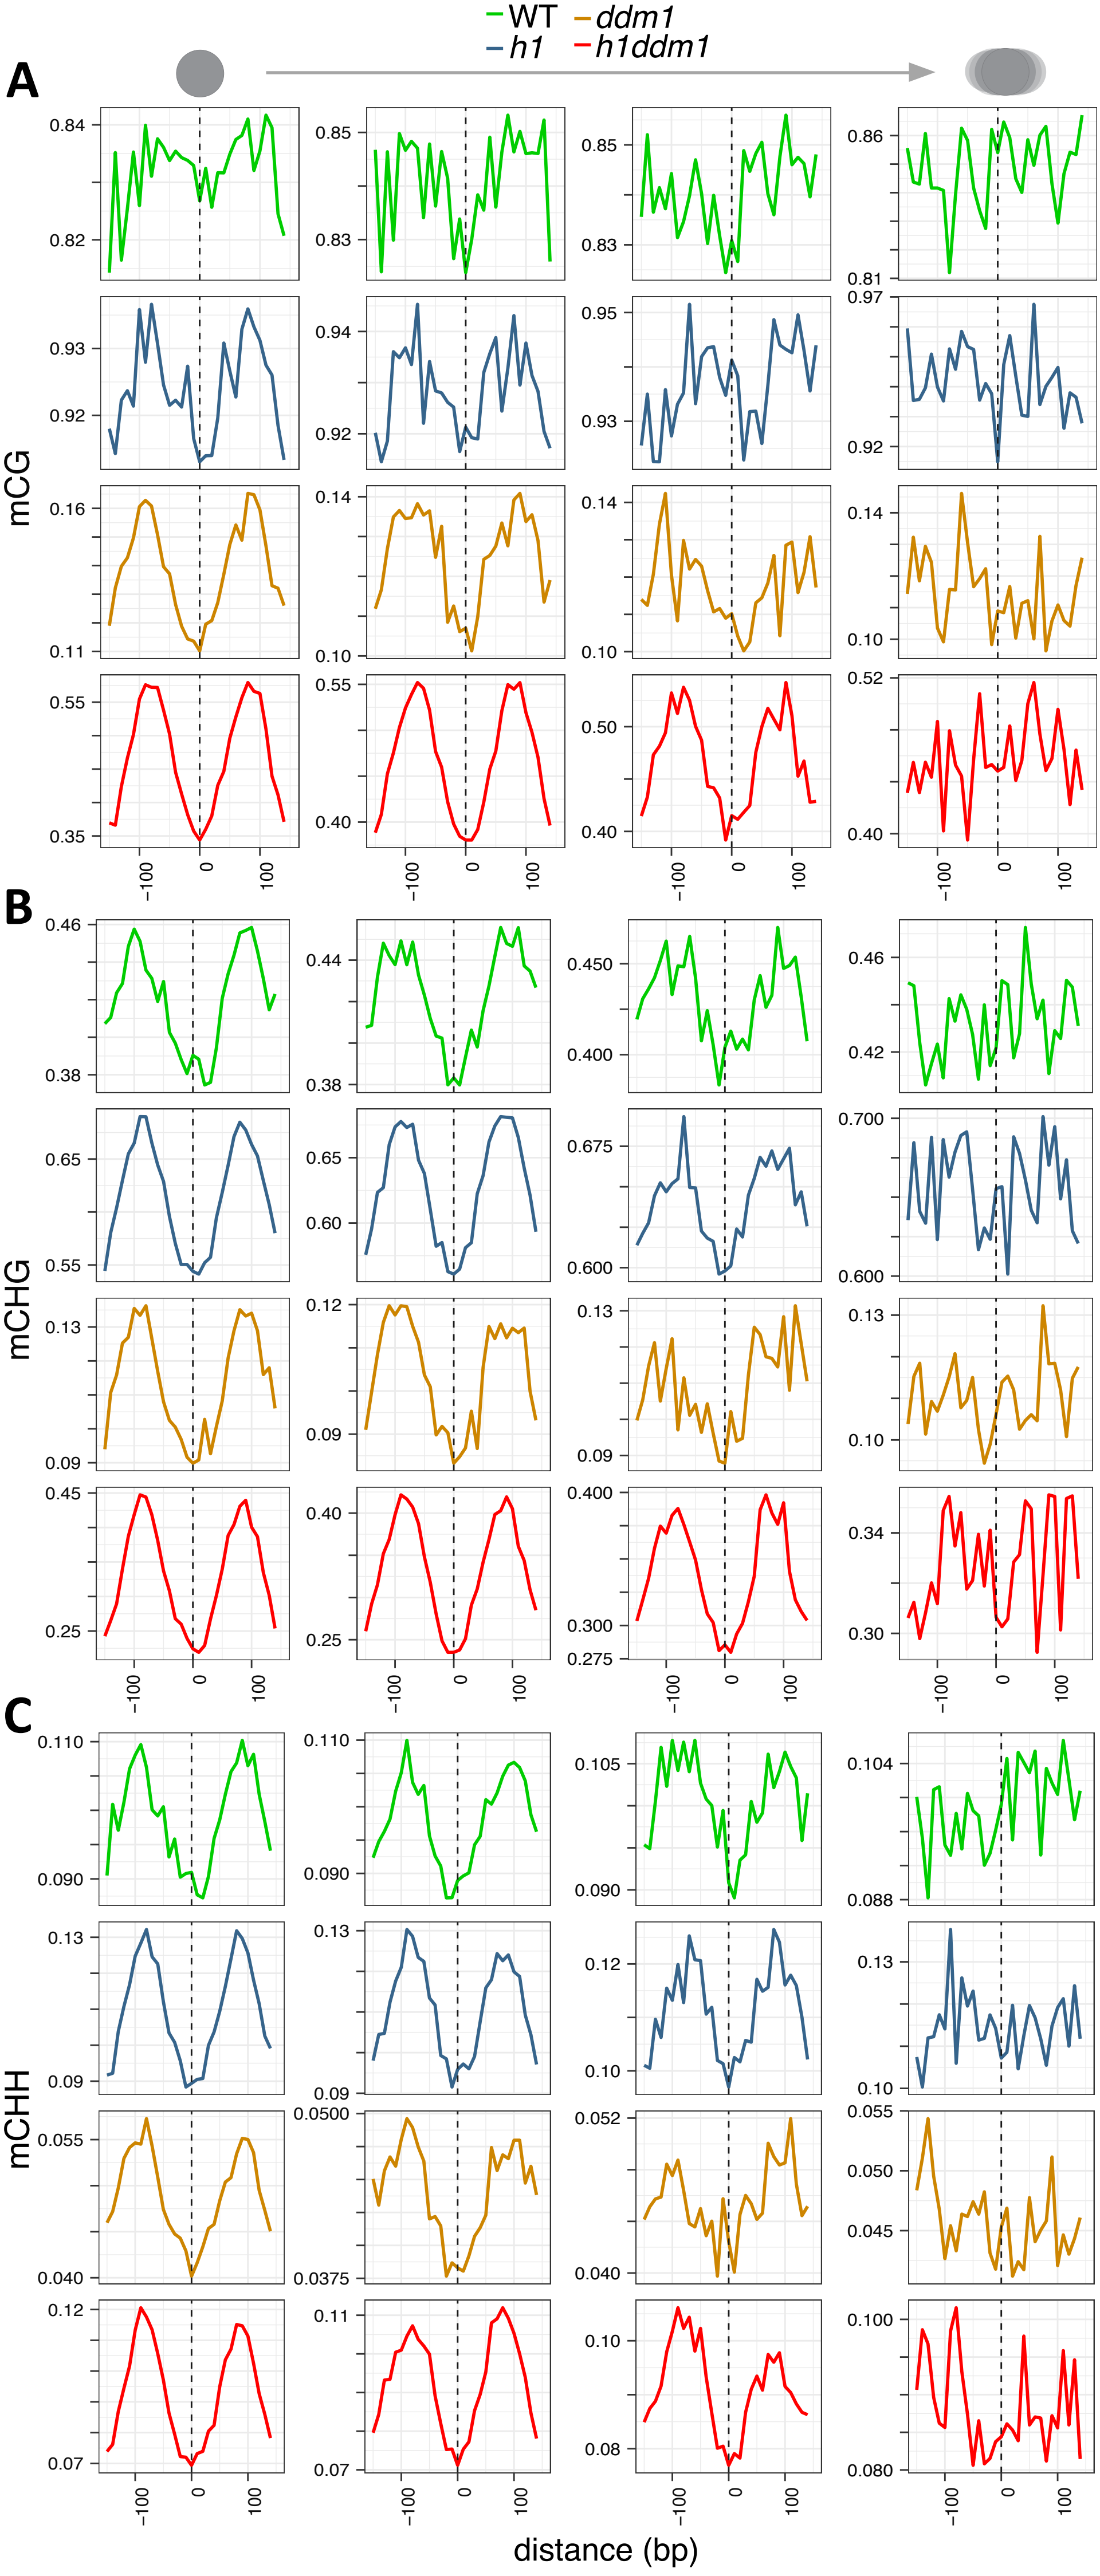

Supplement: supp [file elife-30674-supp-v1.zip]
